# Supplementary material for: Cooperativity of silanol defect chemistry in zeolites
Source: Royal Society of Chemistry journal article supplement (doi:10.1039/d2cp05218k), 2022-12-01
Supplement: d2cp05218k1.pdf [file d2cp05218k1.pdf]

Supporting Information  
for

**Cooperativity of Silanol Defect Chemistry in Zeolites**

Ya-Fan Chen,<sup>[a]</sup> Christian Schroeder,<sup>[b]</sup> Christopher M. Lew,<sup>[c]</sup> Stacey I. Zones,<sup>[c]</sup> Hubert Koller\*<sup>[b]</sup> and  
Marek Sierka\*<sup>[a]</sup>

---

[a] Ya-Fan Chen and Prof. Marek Sierka  
Friedrich Schiller University Jena  
Otto Schott Institute of Materials Research  
Löbdergraben 32  
07743 Jena, Germany  
e-mail: marek.sierka@uni-jena.de

[b] Dr. Christian Schroeder, and Dr. Hubert Koller  
Institut für Physikalische Chemie  
Westfälische Wilhelms-Universität  
Corrensstr. 30  
48149 Münster, Germany  
e-mail: hubert.koller@uni-muenster.de

[c] Dr. Christopher M. Lew and Dr. Stacey I. Zones  
Chevron Technology Center  
Richmond, CA 94801, United States

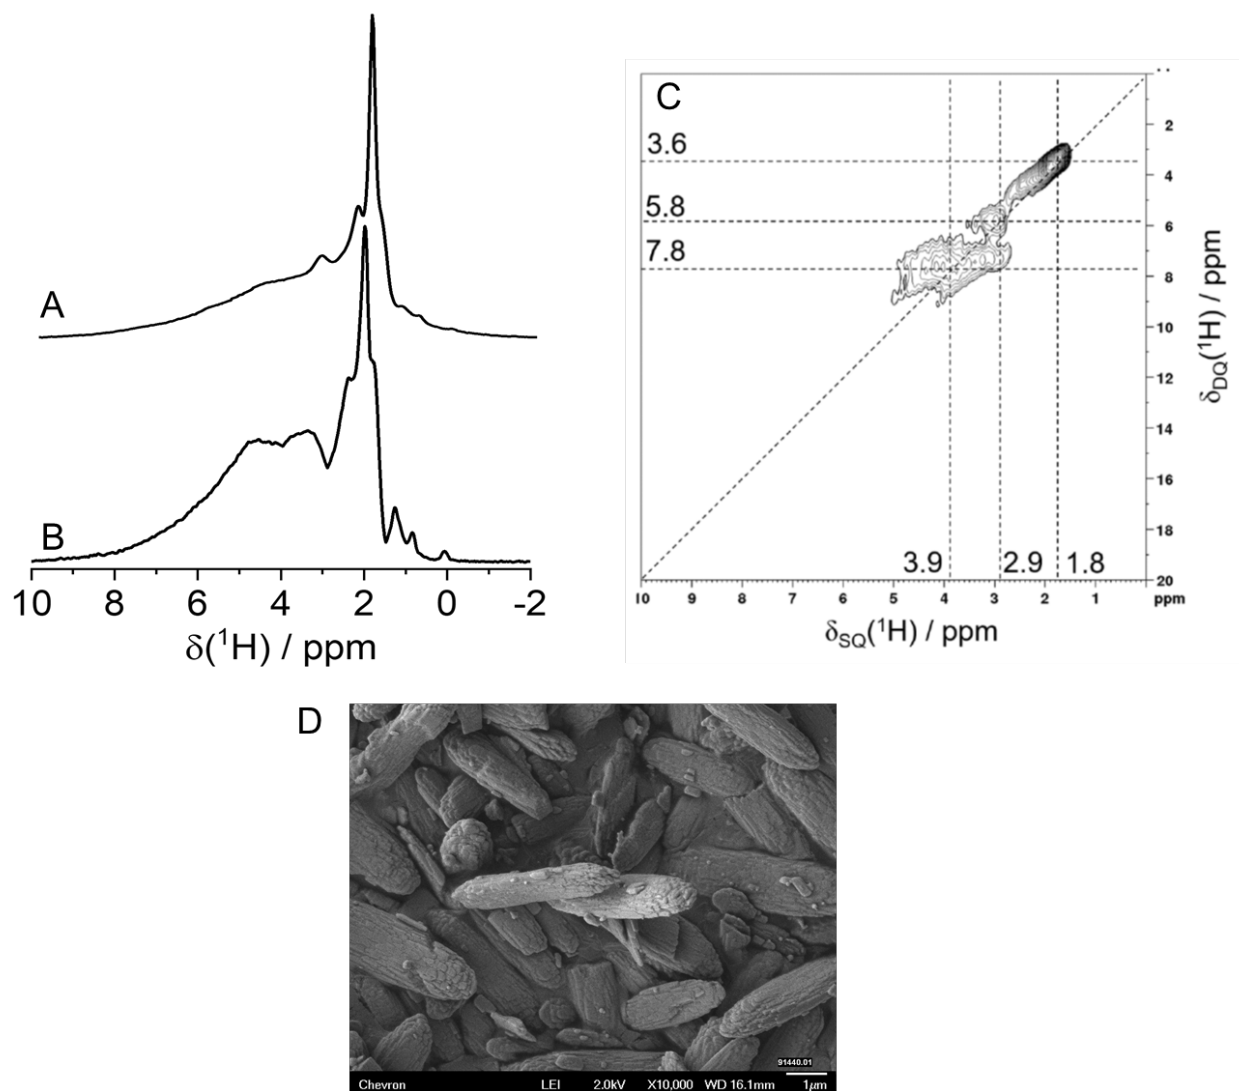

**Fig. S1:** (A)  $^1\text{H}$  MAS NMR spectrum of deboronated SSZ-55, (B) SQ projection of  $^1\text{H}$  DQ-SQ MAS NMR spectrum of deboronated SSZ-55 (Fig. 2), (C)  $^1\text{H}$  DQ-SQ MAS NMR spectrum of SSZ-55 after Al insertion, (D) SEM image of SSZ-55.

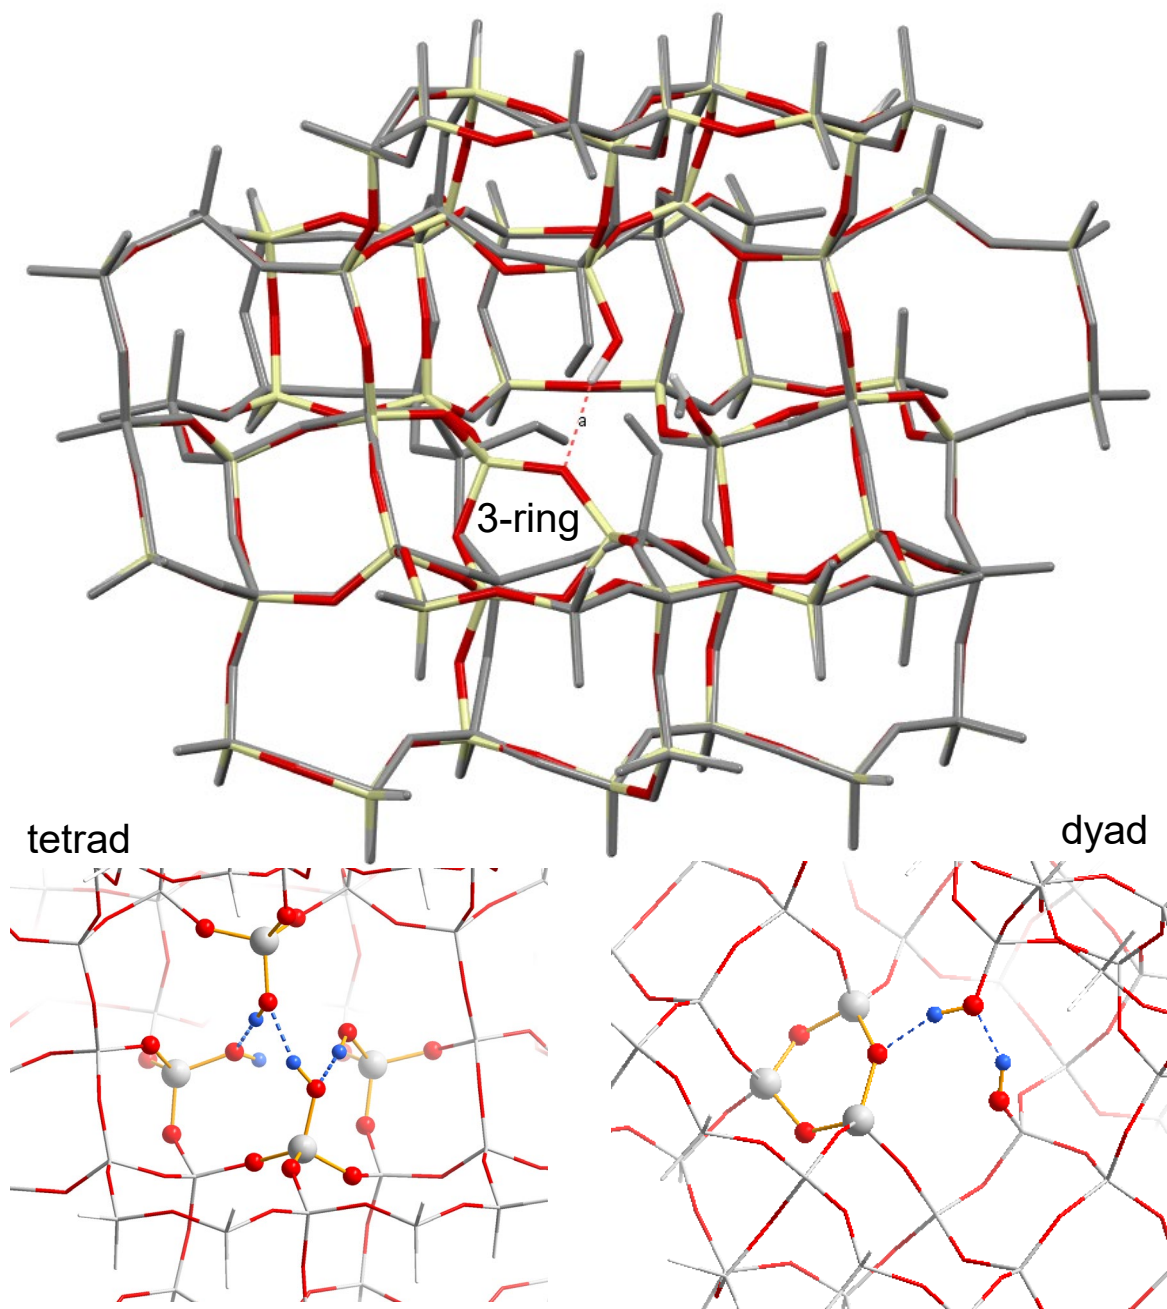

**Fig. S2:** Overlay of a cluster model with a tetrad nest in the center (grey) and a dyad model with two SiOH groups and a 3-ring formed by condensation of two silanols (colored), shown at the top. The clusters are built of 60 T atoms. The two clusters were terminated by hydrogen atoms at the boundaries, which were frozen in the optimization of the cluster geometry. The overlaying figures show that there are significant differences of the geometries near the cluster boundaries, which indicates that the relaxation of the strain caused by silanol condensation for the dyad model does not relax within the finite size of the models. For clarity, the tetrad and dyad model centers are shown at the bottom.

**Table S1:** Reaction energy per defect  $\Delta E$  (kJ/mol) of  $N=1$  for the defect site A.

| Structure        | $\Delta E$         |
|------------------|--------------------|
| A12              | 196.6              |
| A13 <sup>a</sup> | 167.9              |
| A14              | 167.8 <sup>b</sup> |
| A23              | 276.0              |
| A24              | 278.6              |
| A34              | 254.2              |

a) Structure A13 converged to structure A14.

b) The reaction energy per defect is 167.1 kJ/mol from single point B3LYP-D3//PBE calculations.

**Table S2:** Reaction energy per defect  $\Delta E$  (kJ/mol) of  $N=2$  for defect sites (A, B) (defects distance 8.4 Å).

| Structure            | $\Delta E$ | Structure            | $\Delta E$ |
|----------------------|------------|----------------------|------------|
| A12-B12              | 227.4      | A23-B12              | 237.1      |
| A12-B13 <sup>a</sup> | 139.8      | A23-B13 <sup>d</sup> | 207.4      |
| A12-B14              | 177.8      | A23-B14              | 208.7      |
| A12-B23              | 174.2      | A23-B23              | 227.5      |
| A12-B24              | 207.7      | A23-B24              | 279.9      |
| A12-B34              | 139.8      | A23-B34              | 207.4      |
| A13-B12 <sup>b</sup> | 207.4      | A24-B12              | 278.3      |
| A13-B13 <sup>g</sup> | 402.6      | A24-B13 <sup>e</sup> | 216.9      |
| A13-B14              | 225.4      | A24-B14              | 279.1      |
| A13-B23 <sup>g</sup> | 298.6      | A24-B23              | 207.7      |
| A13-B24 <sup>g</sup> | 340.9      | A24-B24              | 278.1      |
| A13-B34 <sup>g</sup> | 316.4      | A24-B34              | 202.1      |
| A14-B12              | 207.4      | A34-B12              | 208.7      |
| A14-B13 <sup>c</sup> | 144.7      | A34-B13 <sup>f</sup> | 201.8      |
| A14-B14              | 219.0      | A34-B14              | 211.8      |
| A14-B23              | 139.8      | A34-B23              | 177.8      |
| A14-B24              | 202.2      | A34-B24              | 253.8      |
| A14-B34              | 182.3      | A34-B34              | 198.7      |

- a) Structure A12-B13 converged to structure A12-B34.  
b) Structure A13-B12 converged to structure A14-B12.  
c) Structure A14-B13 converged to structure A14-B23.  
d) Structure A23-B13 converged to structure A23-B34.  
e) Structure A24-B13 converged to structure A24-B23.  
f) Structure A34-B13 converged to structure A34-B23.  
g) Dangling Si-O bonds were formed.

**Table S3:** Reaction energy per defect  $\Delta E$  (kJ/mol) of  $N=2$  for defect sites (B, C) (defects distance 7.1 Å).

| Structure            | $\Delta E$ | Structure            | $\Delta E$ |
|----------------------|------------|----------------------|------------|
| B12-C12 <sup>a</sup> | 180.9      | B23-C12              | 162.8      |
| B12-C13 <sup>h</sup> | 253.5      | B23-C13 <sup>e</sup> | 144.3      |
| B12-C14              | 424.2      | B23-C14              | 179.2      |
| B12-C23              | 167.7      | B23-C23              | 154.7      |
| B12-C24              | 236.1      | B23-C24              | 216.2      |
| B12-C34              | 191.9      | B23-C34              | 136.7      |
| B13-C12 <sup>b</sup> | 210.6      | B24-C12 <sup>f</sup> | 226.6      |
| B13-C13 <sup>c</sup> | 156.5      | B24-C13 <sup>h</sup> | 339.3      |
| B13-C14 <sup>h</sup> | 267.7      | B24-C14              | 237.9      |
| B13-C23 <sup>d</sup> | 153.1      | B24-C23              | 214.2      |
| B13-C24 <sup>h</sup> | 337.4      | B24-C24              | 233.3      |
| B13-C34              | 248.3      | B24-C34              | 210.9      |
| B14-C12              | 225.1      | B34-C12 <sup>g</sup> | 173.6      |
| B14-C13 <sup>h</sup> | 294.8      | B34-C13 <sup>h</sup> | 320.1      |
| B14-C14              | 290.4      | B34-C14              | 182.5      |
| B14-C23              | 225.6      | B34-C23              | 181.1      |
| B14-C24              | 260.8      | B34-C24              | 227.0      |
| B14-C34              | 165.8      | B34-C34              | 188.7      |

- a) Structure B12-C12 converged to structure B12-C23.  
b) Structure B13-C12 converged to structure B23-C24.  
c) Structure B13-C13 converged to structure B23-C34.  
d) Structure B13-C23 converged to structure B23-C23.  
e) Structure B23-C13 converged to structure B23-C34.  
f) Structure B24-C12 converged to structure B24-C24.  
g) Structure B34-C12 converged to structure B34-C23.  
h) Dangling Si-O bonds were formed.

**Table S4:** Reaction energy per defect  $\Delta E$  (kJ/mol) of  $N=2$  for defect sites (B, D) (defects distance 6.8 Å).

| Structure            | $\Delta E$         | Structure | $\Delta E$ |
|----------------------|--------------------|-----------|------------|
| B12-D12              | 293.6              | B23-D12   | 190.5      |
| B12-D13 <sup>a</sup> | 213.1              | B23-D13   | 313.1      |
| B12-D14              | 215.8              | B23-D14   | 199.4      |
| B12-D23              | 187.0              | B23-D23   | 168.3      |
| B12-D24              | 273.1              | B23-D24   | 222.9      |
| B12-D34              | 221.2              | B23-D34   | 175.5      |
| B13-D12 <sup>g</sup> | 292.0              | B24-D12   | 241.4      |
| B13-D13 <sup>g</sup> | 189.1              | B24-D13   | 304.4      |
| B13-D14 <sup>b</sup> | 154.4              | B24-D14   | 246.1      |
| B13-D23 <sup>c</sup> | 126.6 <sup>c</sup> | B24-D23   | 206.3      |
| B13-D24 <sup>g</sup> | 300.2              | B24-D24   | 219.7      |
| B13-D34 <sup>d</sup> | 182.4              | B24-D34   | 221.2      |
| B14-D12 <sup>e</sup> | 225.1              | B34-D12   | 178.7      |
| B14-D13 <sup>g</sup> | 265.8              | B34-D13   | 211.0      |
| B14-D14 <sup>f</sup> | 164.0              | B34-D14   | 154.9      |
| B14-D23              | 199.6              | B34-D23   | 131.2      |
| B14-D24              | 225.3              | B34-D24   | 210.4      |
| B14-D34              | 185.9              | B34-D34   | 163.6      |

- a) Structure B12-D13 converged to structure B12-D14.  
b) Structure B13-D14 converged to structure B34-D14.  
c) Structure B13-D23 converged to structure B34-D23. The reaction energy per defect is 125.7 kJ/mol from single point B3LYP-D3//PBE calculations.  
d) Structure B13-D34 converged to structure B23-D34.  
e) Structure B14-D12 converged to structure B24-D24.  
f) Structure B14-D14 converged to structure B34-D14.  
g) Dangling Si-O bonds were formed.

**Table S5:** Si-O-Si ring sizes after reaction (1) at each defect site.<sup>a</sup>

| Silanol pair | Si-O-Si ring size |
|--------------|-------------------|--------------|-------------------|--------------|-------------------|--------------|-------------------|
| A12          | 3-ring            | B12          | 5-ring            | C12          | 5-ring            | D12          | 5-ring            |
| A13          | none / 7-ring     | B13          | none / 7-ring     | C13          | none              | D13          | none / 7-ring     |
| A14          | 3-ring            | B14          | 5-ring            | C14          | 5-ring            | D14          | 5-ring            |
| A23          | 5-ring            | B23          | 3-ring            | C23          | 3-ring            | D23          | 3-ring            |
| A24          | 5-ring            | B24          | none / 5-ring     | C24          | 5-ring            | D24          | 5-ring            |
| A34          | 5-ring            | B34          | 3-ring            | C34          | 3-ring            | D34          | 3-ring            |

a) In most cases, 3-rings and 5-rings are formed at defect sites. For distant pairs of silanol groups, in some cases dangling Si-O bonds remain (none). In rare cases, the 7-ring are formed.

**Table S6:** Reaction energy per defect  $\Delta E$  (kJ/mol) of  $N=3$  for defect sites (A, B, C).

| Structure   | $\Delta E$ |
|-------------|------------|
| A12-B23-C34 | 149.7      |
| A12-B34-C12 | 155.2      |
| A12-B34-C14 | 153.6      |
| A12-B34-C23 | 156.0      |
| A12-B34-C34 | 147.2      |
| A14-B23-C34 | 132.5      |
| A23-B23-C34 | 156.3      |
| A34-B23-C34 | 147.8      |

**Table S7:** Reaction energy per defect  $\Delta E$  (kJ/mol) of  $N=3$  for defect sites (A, B, D).

| Structure   | $\Delta E$         |
|-------------|--------------------|
| A12-B34-D12 | 160.8              |
| A12-B34-D14 | 124.4              |
| A12-B34-D23 | 123.1 <sup>a</sup> |
| A12-B34-D34 | 163.8              |
| A14-B34-D23 | 151.7              |
| A23-B34-D23 | 155.1              |
| A34-B34-D23 | 152.3              |

a) The reaction energy per defect is 118.8 kJ/mol from single point B3LYP-D3//PBE calculations.



**Table S8:** Reaction energies per defect (kJ/mol) of  $N=3^*$  for defect sites (A, B, D).

| Structure   | $\Delta E$        |
|-------------|-------------------|
| A00-B34-D14 | 108.3             |
| A00-B34-D23 | 88.6 <sup>a</sup> |
| A12-B00-D14 | 116.5             |
| A12-B00-D23 | 111.9             |
| A12-B34-D00 | 104.8             |

a) The reaction energy per defect is 85.3 kJ/mol from single point B3LYP-D3//PBE calculations.

The  $^1\text{H}$  NMR chemical shifts were calculated using the formula:  $\delta = \sigma_{\text{ref}} - \sigma + \delta_{\text{ref}}$ , where  $\sigma_{\text{ref}}$  and  $\sigma$  are the NMR shielding constants of the reference and calculated species, respectively. The reference species is tetramethylsilane (TMS) with  $\delta_{\text{ref}} = 0$ . The same level of theory was used to calculate  $\sigma_{\text{ref}}$  and  $\sigma$ . Fig. S3 shows the correlation between the higher  $^1\text{H}$  chemical shift value from the silanol group participating as a proton donor and the O-O distance between two silanol groups. All calculated  $^1\text{H}$  NMR chemical shifts are summarized in Table S9. The  $^1\text{H}$  chemical shift values of silanol dyads from the experiment are 3.4 and 4.6 ppm.

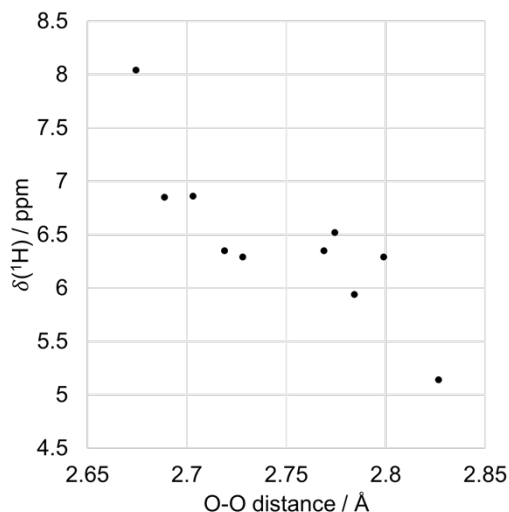

**Fig. S3:** Correlation between the higher  $^1\text{H}$  chemical shift value from the silanol group participating as a proton donor and the O-O distance between two silanol groups.

**Table S9:** Calculated  $^1\text{H}$  NMR chemical shifts (ppm).

| Structure   | Defect site | $^1\text{H}$ NMR chemical shift |                        |
|-------------|-------------|---------------------------------|------------------------|
|             |             | Hydrogen bond donor             | Hydrogen bond acceptor |
| B34-D23     | B           | 6.9                             | 2.7                    |
|             | D           | 6.3                             | 3.3                    |
| A12-B34-D23 | A           | 6.4                             | 3.2                    |
|             | B           | 6.5                             | 2.6                    |
|             | D           | 5.1                             | 3.4                    |
| A12-B34-D14 | A           | 5.9                             | 2.7                    |
|             | B           | 8.0                             | 4.4                    |
|             | D           | 6.3                             | 2.9                    |
| A00-B34-D23 | A           | -                               | -                      |
|             | B           | 6.9                             | 2.7                    |
|             | D           | 6.3                             | 3.4                    |

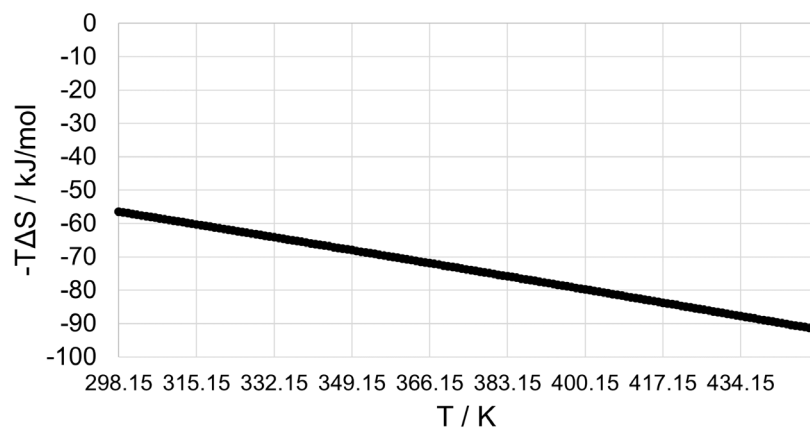

**Fig. S4:** Entropy contribution ( $-T\Delta S$ ) of water molecule as a function of temperature.
